# Supplementary material for: Loss of the abasic site sensor HMCES is synthetic lethal with the activity of the APOBEC3A cytosine deaminase in cancer cells
Source: PLoS Biol. 2021 Mar 31;19(3):e3001176. doi: 10.1371/journal.pbio.3001176 (PMC8041192; doi:10.1371/journal.pbio.3001176)
Supplement: S1 Data — All numerical raw data associated with Fig 1A and 1C. File contains multiple tabs with labels corresponding to the relevant figure. (XLSX) [file pbio.3001176.s021.xlsx]

## Sheet: Fig 1A
Fig 1A numerical data
NCI-H358	A3A
Dose	rep1	rep2
0	1.01227	1.004
0.5	17.1154	41.7826
1	22.0181	99.2807
2	71.2356	168.297
4	87.26	206.484
8	143.233	519.111
LXF-289	A3A
Dose	rep1	rep2	rep3
0	1.01396	1.00044	1.00434
0.5	37.4809	52.3214	97.0765	1.00705
1	47.3638	118.487	138.371	94.7571
2	269.762	140.08		101.019
8	304.205	226.624	248.046	104.86
A549	A3A
Dose	rep1	rep2
0	1.0217	1.01406
1	212.128	108.917
2	243.454	150.2
8	392.497	192.731
A549-p53	A3A
Dose	rep1	rep2	rep3
0		1.16975	0.854884
1	89.4339		75.9327
2	151.22		65.2678
4	175.43	242.619	194.732
8	196.237	118.148	93.9323

## Sheet: Fig 1C
NCI-H358
	Control			A3A
Dose	rep1	rep2	rep3	rep1	rep2	rep3
0	100	100	100	100	100	100
0.5	64.5877	46.681	77.7869	41.1014	64.1195	43.423
1	64.3914	44.8519	70.5786	38.259	52.7872	32.0071
2	64.8225	40.6577	74.4249	43.2989	57.4306	37.0774
4	69.3292	44.999	69.1437	39.7689	65.2936	36.5692
8	58.0203	31.386	69.122	23.614	47.2522	22.9379
Fig 1C numerical data
LXF-289
	Control			A3A
Dose	rep1	rep2	rep3	rep1	rep2	rep3
0	100	100	100	100	100	100
0.5	94.1158	84.8416	68.0704	46.8818	90.7021	48.6197
1	105.988	77.4896	71.0845	41.2693	72.1766	52.7054
2	102.275	72.2411	62.6018	32.129	76.3339	53.2039
4	112.809	69.4651	59.3882	23.2071	53.3178	40.7235
8	80.4567	51.6917	55.4967	11.8082	39.9466	40.3305
A549
	Control			A3A
Dose	rep1	rep2	rep3	rep1	rep2	rep3
0	100	100	100	100	100	100
1	90.7334	108.604	99.6685	94.5203	84.9403	89.7303
2	83.6848	67.0199	75.3524	92.5548	83.9591	88.257
4	67.6642	92.6123	80.1382	60.8137	84.2954	72.5546
8	22.4861	43.2696	32.8779	24.9441	41.0242	32.9841
A549-p53
	Control p53-/-			A3A P53-/-
Dose	rep1	rep2		rep1	rep2
0	100	100		100	100
0.5	97.0092	86.1968		95.2011	91.603
1	88.8379	78.5453		81.5127	83.6916
2	74.7505	73.072		58.3803	73.9113
4	76.9178	88.3582		56.3921	82.638
8	80.6039	89.8193		71.2486	77.8162
